# Supplementary material for: DNA-Binding One Finger Transcription Factor PhDof28 Regulates Petal Size in Petunia
Source: MDPI journal article supplement (doi:10.3390/ijms241511999), 2023-07-26
Supplement: s1 [file s1]

## SUPPLEMENTARY MATERIALS

Supplementary figure legends

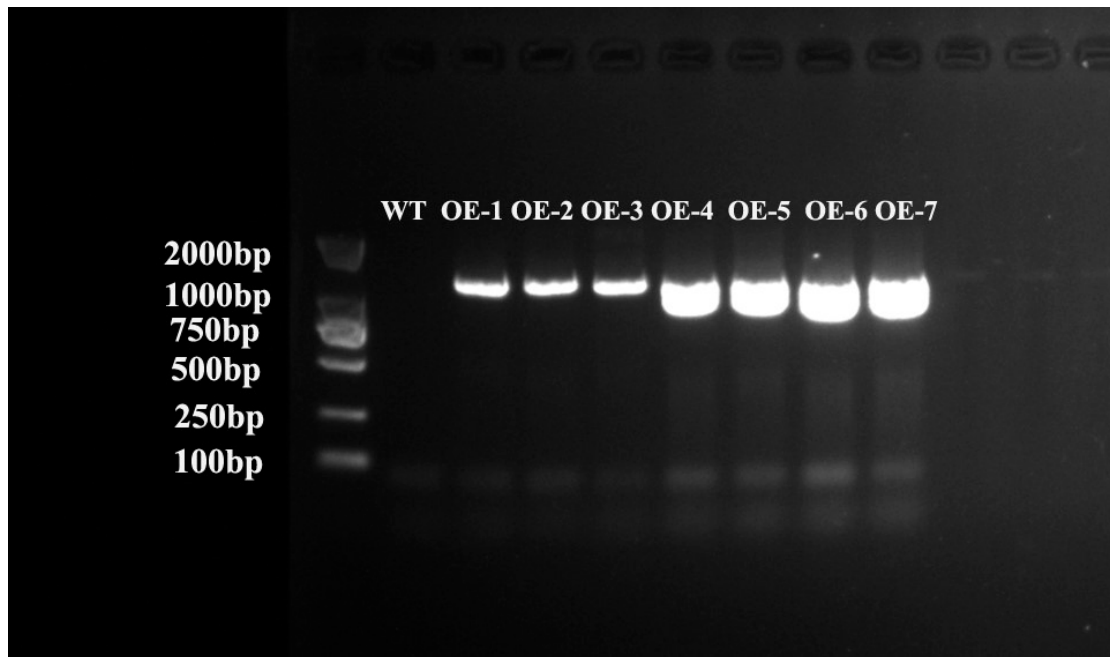

**Figure S1.** PCR positive detection of F<sub>0</sub> generation transgenic petunia.

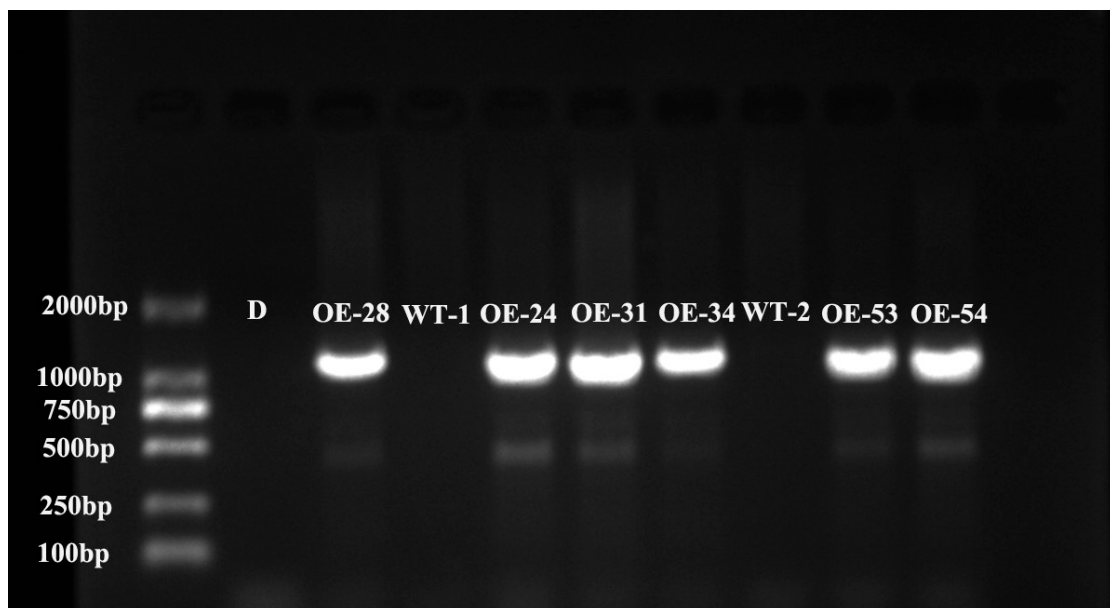

**Figure S2.** PCR positive detection of F<sub>0</sub> generation transgenic tobacco. Label D means the ddH<sub>2</sub>O was used as the template of blank control. Label D means the ddH<sub>2</sub>O was used as the template of blank control.

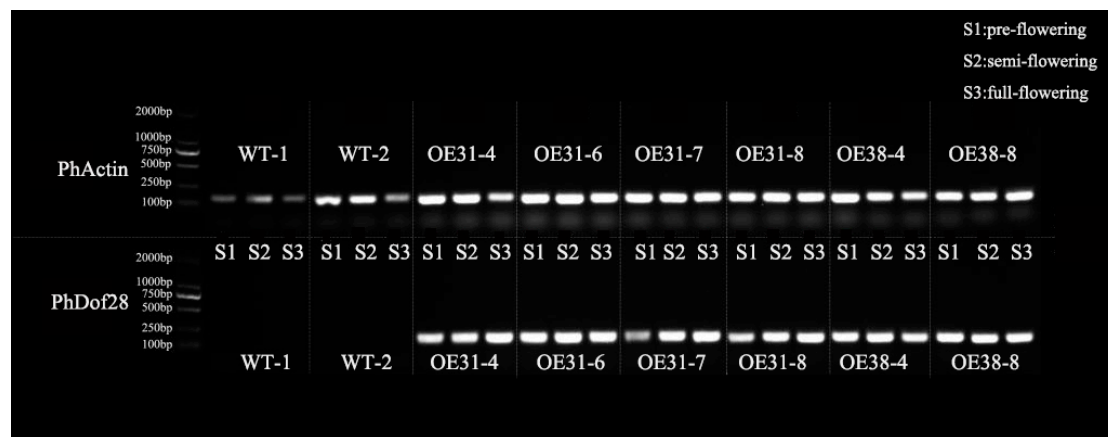

**Figure S3.** Semi quantitative PCR of transgenic tobacco F<sub>1</sub> plants.

**Table S1.** Primer sequence used in this study.

| Primer Name  | Primer Sequence              |
|--------------|------------------------------|
| 35S-F        | ACGCACAATCCCACTATCCTTC       |
| PhDof28-R    | AAAAAGGAGAGATATAGATCAAGGTAG  |
| 28qpcr-F     | GGGAAC TTTACAAATCTGATGACG    |
| 28qpcr-R     | GAAACCCGAAC TATTACCACCC      |
| PhActin-F    | GTTGGACTCTGGTGATGGTGTG       |
| PhActin-R    | CCGTT CAGCAGTGGTGGTG         |
| q-PhEXPA1-F  | AGCTCCTACACTTCTCTTCCA        |
| q-PhEXPA1-R  | GGAAAAGTAAGGTTCTTATTATGAGGT  |
| q-PhEXPA2-F  | TGTTTTATGATTTCTTCCCTCTTAAA   |
| q-PhEXPA2-R  | GCATATTACTATTCTATTCCGAATGT   |
| q-PhEXPA3-F  | GATTTTGAGGGTATTGCTATTAGATTGT |
| q-PhEXPA3-R  | CCACCTCTGCTTACTCAGGC         |
| q-PhBPEp-F   | GGAAATGGTGACCTTGCTGG         |
| q-PhBPEp-R   | TTCCAAATTCACATCCCTCCTC       |
| q-PhNAC100-F | AGTGCAGGAGGGAAGAAAATACA      |
| q-PhNAC100-R | GGAGAAGCAGGTCACATGAGAATA     |
| q-PhCesA6-F  | TACAGGGTGACGAGGAAGAAGAT      |
| q-PhCesA6-R  | GCTCAAAAGCATAACACTGGAAGT     |
| q-RhCesA9-F  | AAAGGGAGCCCCAGAGTTGA         |
| q-RhCesA9-R  | CAGAAATATGCAGCCTCGGAAA       |
| q-RhCesA5-F  | CCAAGGTTCTGGGTCCAGTT         |
| q-RhCesA5-R  | GGATGCTGATGACTCCGTATGA       |
| q-PhPIP1;1-F | GTCTCCTCTTTTCAGCCATTTTG      |
| q-PhPIP1;1-R | CGCCGATCTCATTCACTTCTTC       |
| q-PhPIP2;1-F | CTAAACCACATCCTCACAACCAG      |
| q-PhPIP2;1-R | CCACATACGTTCTCTTACACACAT     |
| q-XTH6-F     | CAAGTTTAGAACCTGCGATACCC      |
| q-XTH6-R     | TGGTGGCTGATTTTCCTCTTC        |
| q-XTH22-F    | GGTATGGAATGGGCAAAGGT         |
| q-XTH22-R    | ATTCTCCAGGCAGGGGTC           |
| q-XTH23-F    | GCCTTGGCATTTCATTTTCA         |
| q-XTH23-R    | CGTTATCCGTGTCCGAGTTCAT       |
